# Supplementary material for: Microfibrous Scaffolds Guide Stem Cell Lumenogenesis and Brain Organoid Engineering
Source: PubMed Central journal article supplement (PMC7617127; doi:10.1002/adma.202300305), 2023-09-08
Supplement: EMS193196-supplement-Supplementary_material.pdf [file EMS193196-supplement-Supplementary_material.pdf]

# ADVANCED MATERIALS

## Supporting Information

for *Adv. Mater.*, DOI 10.1002/adma.202300305

Microfibrinous Scaffolds Guide Stem Cell Lumenogenesis and Brain Organoid Engineering

*Kaja I. Ritzau-Reid, Sebastien J. P. Callens, Ruoxiao Xie, Martina Cihova, Daniel Reumann, Christopher L. Grigsby, Lino Prados-Martin, Richard Wang, Axel C. Moore, James P. K. Armstrong, Juergen A. Knoblich\* and Molly M. Stevens\**

## Supporting information

### Microfibrous scaffolds guide stem cell lumenogenesis and brain organoid engineering

*Kaja I. Ritzau-Reid<sup>1</sup>, Sebastien J. P. Callens<sup>1</sup>, Ruoxiao Xie, Martina Cihova, Daniel Reumann, Christopher L. Grigsby, Lino Prados-Martin, Richard Wang, Axel C. Moore, James P. K. Armstrong, Juergen A. Knoblich,\* Molly M. Stevens.\**

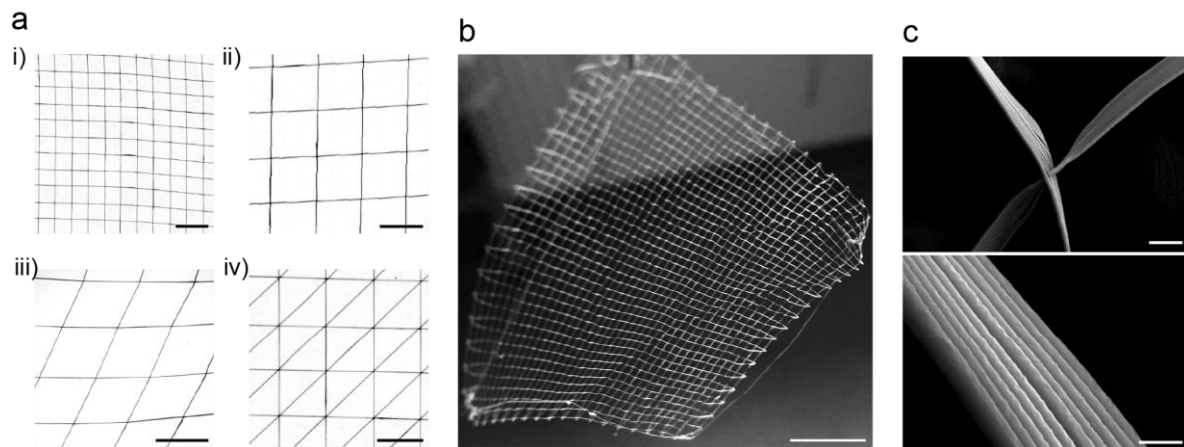

**Supplementary Figure 1. Fabrication of scaffolds using MEW.** a) Brightfield images of different MEW scaffold geometries, including: i) square grid scaffolds with 500  $\mu\text{m}$  spacing, ii) square grid scaffolds with 1000  $\mu\text{m}$  spacing, iii) rhombus grid scaffolds with 1000  $\mu\text{m}$  spacing, iv) triangle grid scaffolds. Scale bar corresponds to 500  $\mu\text{m}$ . b) Photograph of a PCL scaffold fabricated by MEW. Scale bar corresponds to 1 cm. c) SEM images of scaffolds with a square grid geometry. Scale bar corresponds to 50  $\mu\text{m}$  (top) and 10  $\mu\text{m}$  (bottom).

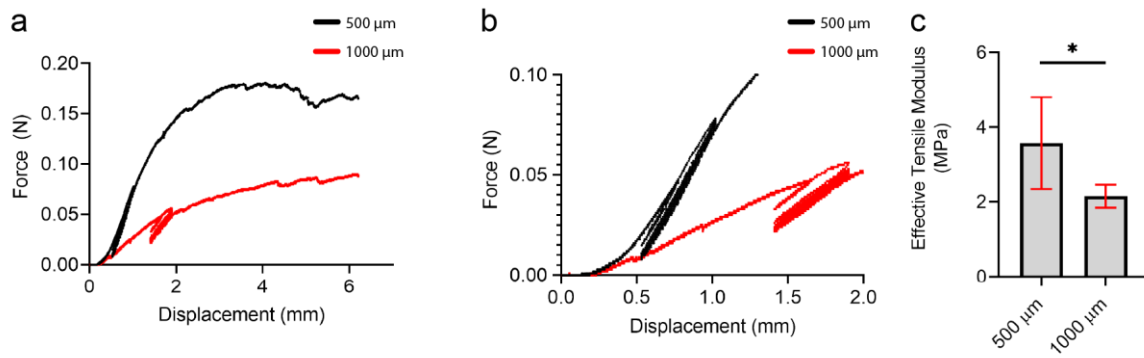

**Supplementary Figure 2. Mechanical characterization of MEW scaffolds.** a-b) Force-displacement curves of square grid scaffolds with 500  $\mu\text{m}$  and 1000  $\mu\text{m}$  spacing. c) Mean effective tensile modulus of square grid scaffolds of 500  $\mu\text{m}$  and 1000  $\mu\text{m}$  spacing (N = 5). Data represent mean  $\pm$  s.d. \*  $p < 0.05$ , determined by unpaired t-test.

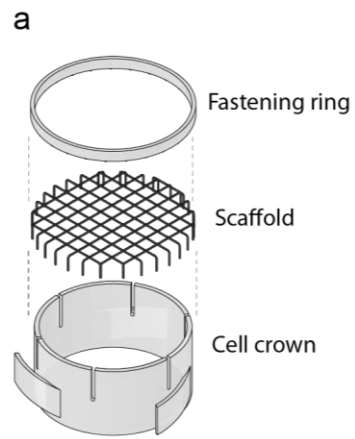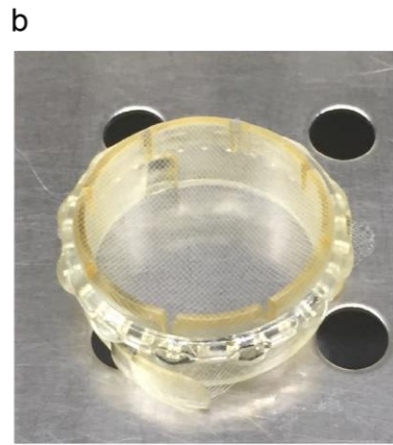

**Supplementary Figure 3. Scaffold preparation for cell culture.** a) Schematic of cell crown and scaffold assembly. b) Photograph of a PCL scaffold fabricated by MEW and assembled in cell crown holder.

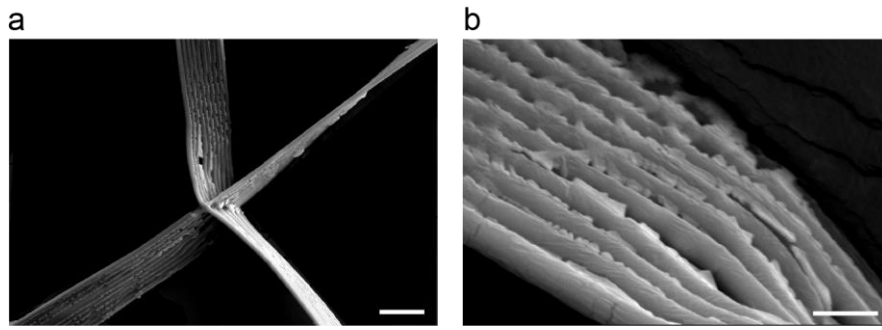

**Supplementary Figure 4. SEM images of scaffolds coated with Matrigel basement membrane extract. Scale bar corresponds to left: 50  $\mu\text{m}$ , right: 10  $\mu\text{m}$ .**

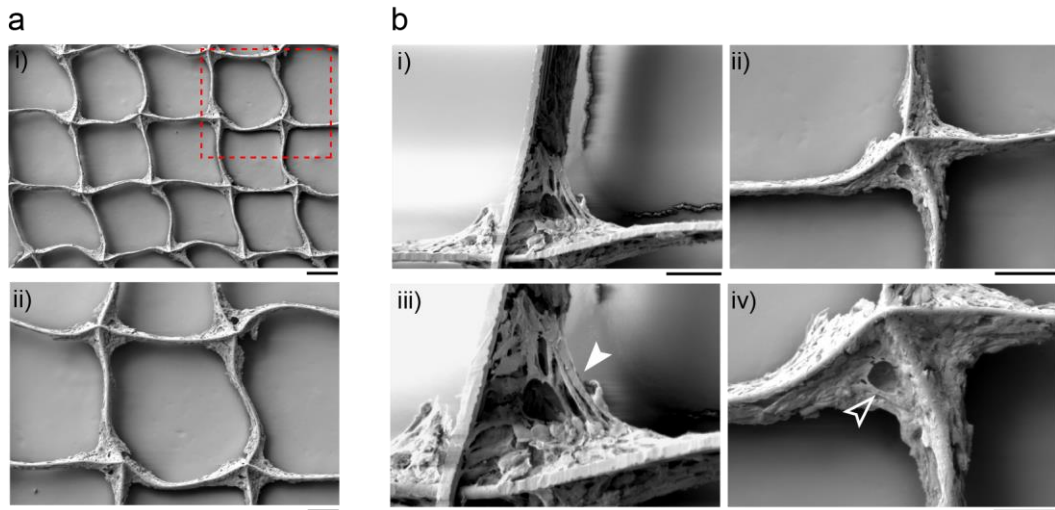

**Supplementary Figure 5. SEM characterization of EB tissues on MEW.** a)

Representative SEM images of EB tissue on PCL scaffolds at day 5. Scale bar corresponds to 200  $\mu\text{m}$  (i) and 100  $\mu\text{m}$  (ii). b) High magnification images show elongated cells at the growing edge of the scaffold corner (solid white arrowhead) and the indent in the tissue of the lumen at the corner of the scaffold (empty white arrowhead). Scale bars correspond to (i) 50  $\mu\text{m}$ , (ii) 100  $\mu\text{m}$ , (iii) 20  $\mu\text{m}$ , (iv) 50  $\mu\text{m}$ .

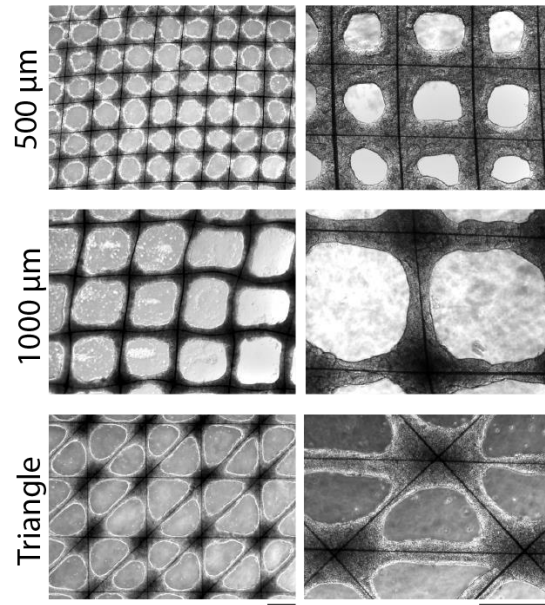

**Supplementary Figure 6. Cerebral organoids on scaffolds at day 17.** Representative brightfield images showing the development of cerebral organoids on scaffolds at day 17 on square grid scaffolds of 500  $\mu\text{m}$  spacing, square grid scaffolds of 1000  $\mu\text{m}$  spacing, and on triangle grid scaffolds. Scale bars corresponds to 500  $\mu\text{m}$ .

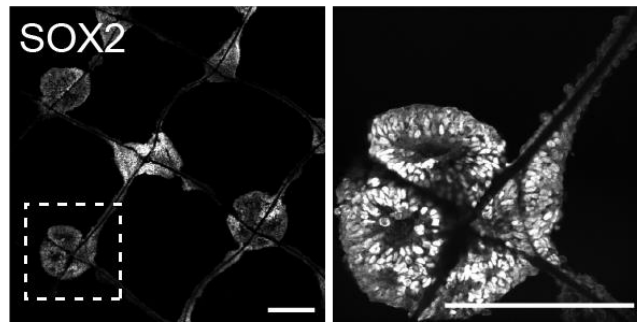

**Supplementary Figure 7.** Histological sections of organoids at day 20 immunostained with the neural progenitor marker SOX2. The image on the left shows an overview of multiple organoids and the image on the right shows a magnified view of the respective region marked with a white dashed line (representative images from 1 or 2 independent scaffolds). Scale bars correspond to 200  $\mu\text{m}$ .



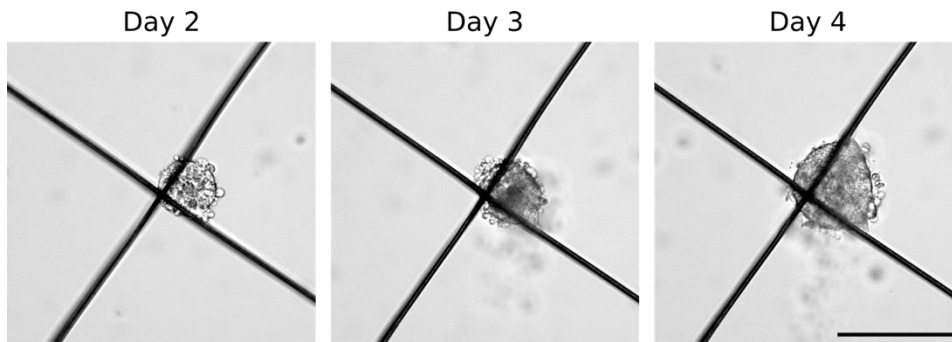

**Supplementary Figure 8. EB tissue formation at scaffold intersections.** Representative brightfield time-lapse images at Day 2-4 show hESCs aggregate and grow EB tissue at the scaffold intersection. 7 positions were imaged on one scaffold (N = 1, n = 7). Scale bar corresponds to 200  $\mu\text{m}$ .

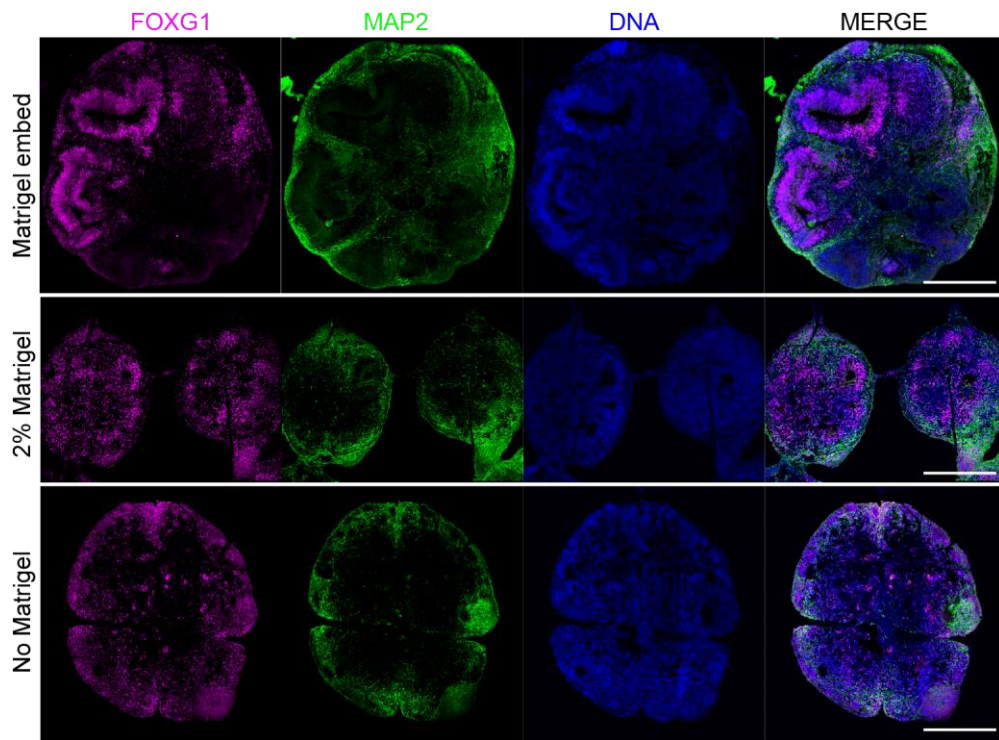

**Supplementary Figure 9. Matrigel embedding optimization.** Image gallery showing representative images from histological sections of organoids on scaffolds from different treatments: Matrigel embedding (top row), supplementation with 2% Matrigel (middle row) and a control group without Matrigel. Sections were immunostained with forebrain marker FOXG1 (magenta), neuronal marker MAP2 (green) and counterstained with DAPI (blue). (Representative images from a minimum of 2 independent scaffolds). Scale bar corresponds to 500  $\mu\text{m}$ .

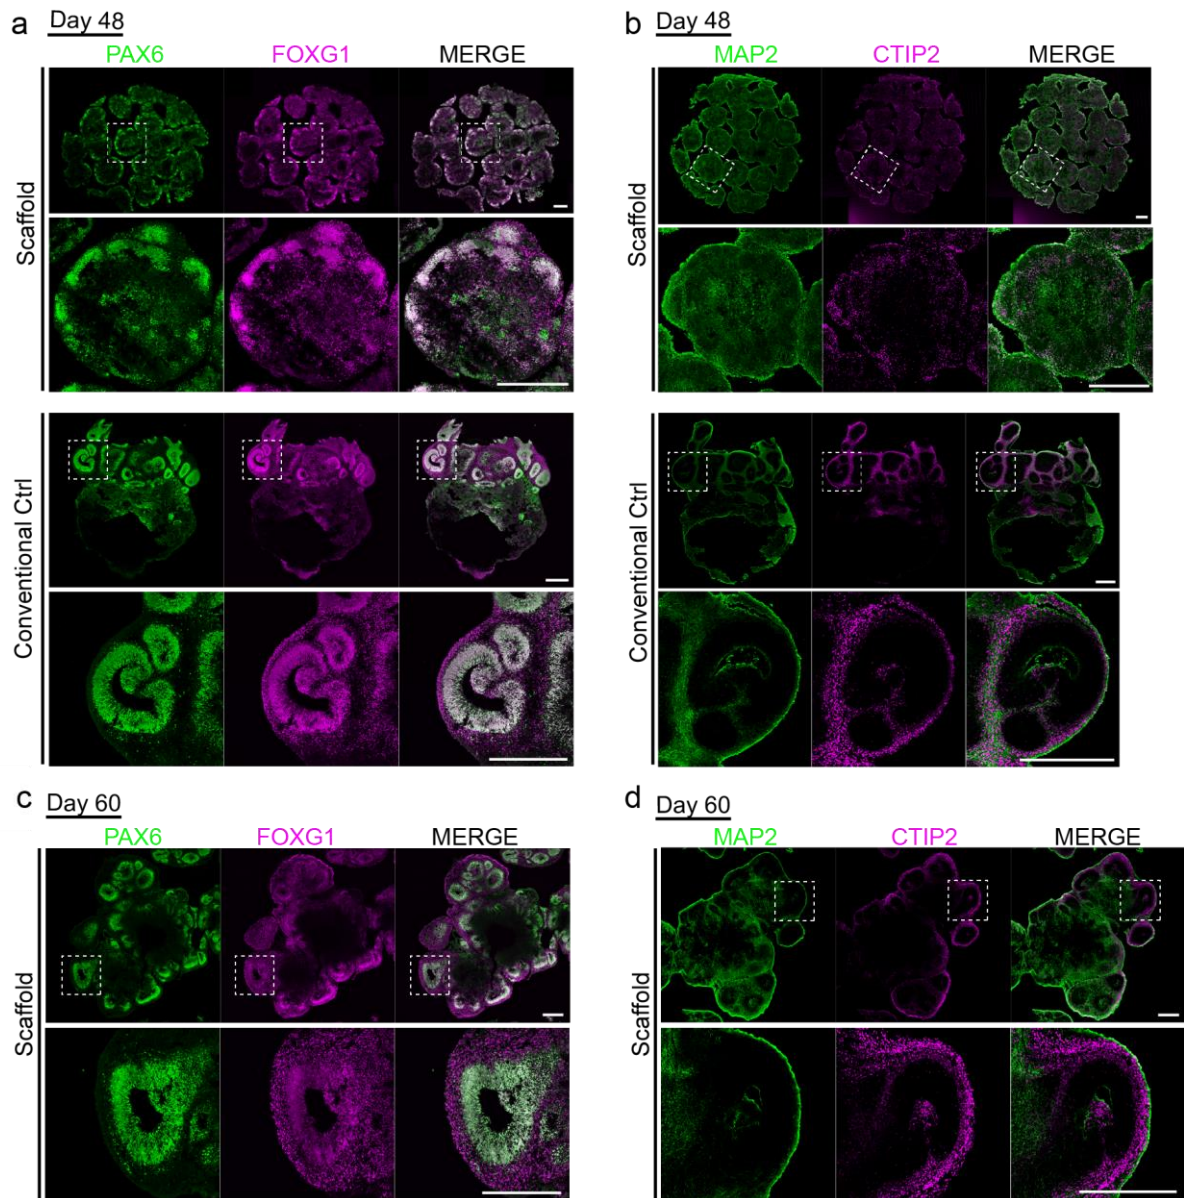

**Supplementary Figure 10. Immunostaining characterization of long-term cerebral organoid culture on scaffolds.** a) Image gallery of day 48 organoid histological sections immunostained with dorsal marker PAX6 (green) and forebrain marker FOXG1 (magenta) (Representative images from 1 scaffold). Scale bar corresponds to 500  $\mu\text{m}$ . b) Image gallery of day 48 organoid histological sections immunostained with neuronal marker MAP2 (green), and deep cortical marker CTIP2 (magenta). Magnified regions are marked with a white dashed line (Representative images from 1 scaffold). Scale bar corresponds to 500  $\mu\text{m}$ . c) Image gallery of day 60 scaffold organoid histological sections immunostained with dorsal marker PAX6 (green), and forebrain marker FOXG1 (magenta) (Representative images from 1 scaffold). Scale bar corresponds to 500  $\mu\text{m}$ . d) Image gallery of day 60 organoid histological sections immunostained with neuronal marker MAP2 (green), and deep cortical marker CTIP2 (magenta). Magnified regions are indicated by white dashed line. (Representative images from 1 scaffold). Scale bar corresponds to 500  $\mu\text{m}$ .

**Supplementary Table S1 | Primary antibodies used.**

| Antigen    | Host species | Supplier          | Cat number | Dilution |
|------------|--------------|-------------------|------------|----------|
| SOX2       | Rabbit       | Abcam             | ab97959    | 1:600    |
| Z01        | Moy use      | Thermo Scientific | 33-9100    | 1:50     |
| NANOG      | Rabbit       | Abcam             | ab21624    | 1:100    |
| OCT4       | Mouse        | Abcam             | ab184665   | 1:100    |
| FOXG1      | Rabbit       | Abcam             | ab18259    | 1:200    |
| PAX6       | Sheep        | R&D Systabems     | AF8150     | 1:200    |
| aPKCzeta   | Mouse        | Santa Cruz        | SC-17781   | 1:200    |
| TUJ1       | Mouse        | Sigma-Aldrich     | T8578      | 1:500    |
| N-cadherin | Mouse        | BD Biosciences    | 610920     | 1:500    |
| GSX2       | Rabbit       | Sigma-Aldrich     | ABN162     | 1:500    |
| TBR1       | Rabbit       | Abcam             | ab31940    | 1:300    |
| MAP2       | Chicken      | Abcam             | ab5392     | 1:500    |
| CTIP2      | Rat          | Abcam             | ab18465    | 1:300    |
